# Supplementary material for: Correlation between Mechanical and Morphological Properties of Polyphenol-Laden Xanthan Gum/Poly(vinyl alcohol) Composite Cryogels
Source: MDPI journal article supplement (doi:10.3390/gels9040281), 2023-03-29
Supplement: s1 [file s1]

Supplementary Materials:

## Correlation between Mechanical and Morphological Properties of Polyphenol-Laden Xanthan Gum/Poly(Vinyl Alcohol) Composite Cryogels

Irina Elena Raschip \*, Raluca Nicoleta Darie-Nita, Nicusor Fifere, Gabriela-Elena Hitruc, Maria Valentina Dinu

Petru Poni" Institute of Macromolecular Chemistry, Grigore Ghica Voda Alley 41A, 700487 Iasi, Romania

\* Correspondence: [iecoj@icmpp.ro](mailto:iecoj@icmpp.ro) (I.E. Raschip)

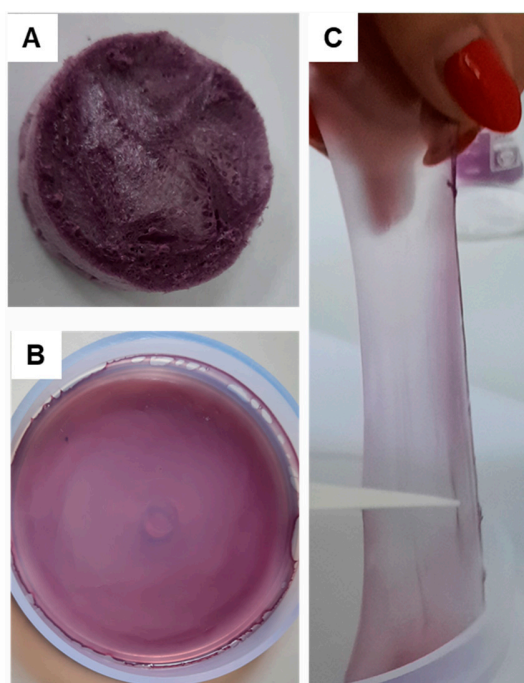

**Figure S1.** Optical images of the polyphenol-loaded XG/PVA composite hydrogels prepared with a weight ratio between XG and PVA of 1:1, and 10 v/v% Feteasca Neagra polyphenolic extracts dried by lyophilization (A) and solvent casting (B, C).

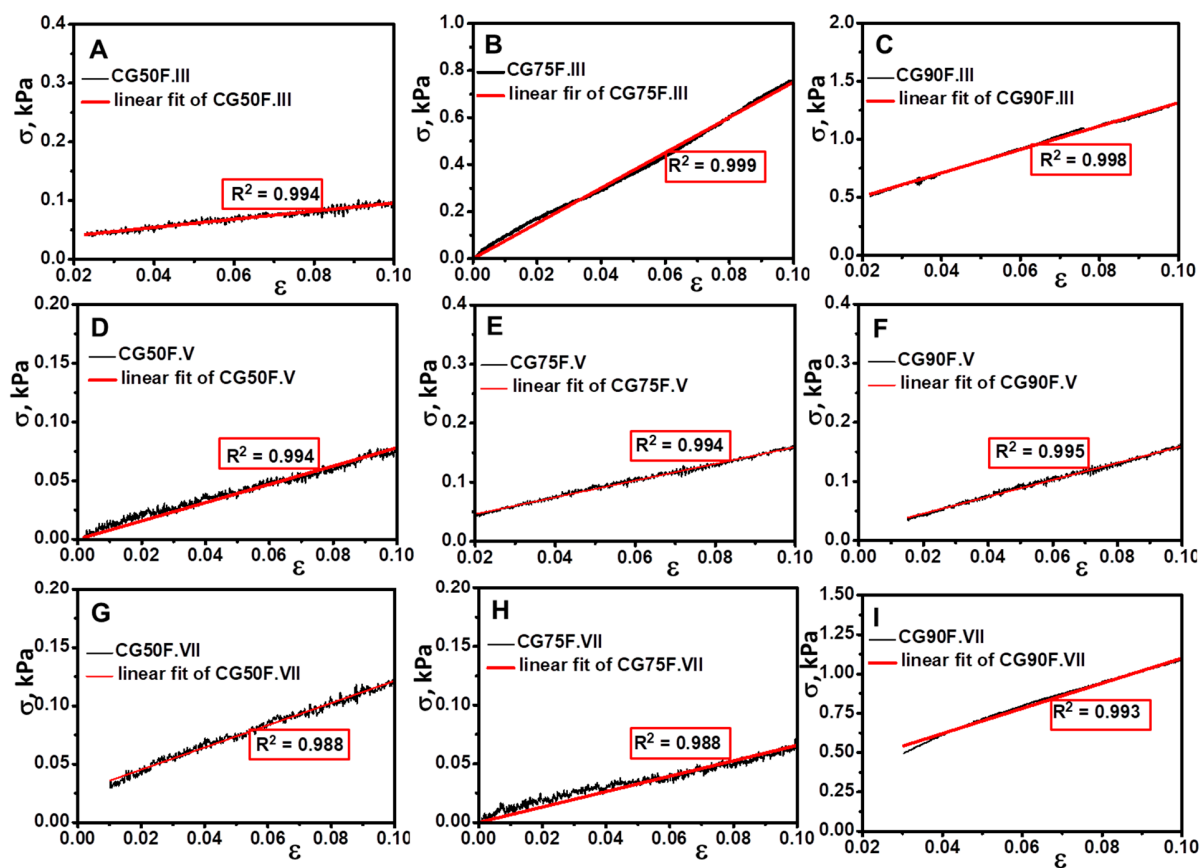

**Figure S2.** Linear dependence of the stress-strain data for XG-based composite hydrogels.
